# Supplementary material for: In Vivo Molecular Dissection of the Effects of HIV-1 in Active Tuberculosis
Source: PLoS Pathog. 2016 Mar 17;12(3):e1005469. doi: 10.1371/journal.ppat.1005469 (PMC4795555; doi:10.1371/journal.ppat.1005469)
Supplement: S1 File — (XLSX) [file ppat.1005469.s015.xlsx]

## Sheet: TFBS analysis suppl to Fig. 1
TF	JASPAR ID	Class	Family	Tax Group	IC	GC Content	Target gene hits	Target gene non-hits	Background gene hits	Background gene non-hits	Target TFBS hits	Target TFBS nucleotide rate	Background TFBS hits	Background TFBS nucleotide rate	Z-score	Fisher score
NF-kappaB	MA0061.1	Ig-fold	Rel	vertebrates	13.345	0.621	697	942	8381	16371	1712	0.00711	18865	0.00524	40.143	27.555
ELF5	MA0136.1	Winged Helix-Turn-Helix	Ets	vertebrates	8.693	0.429	1211	428	16547	8205	8904	0.0333	117435	0.0294	35.971	20.476
RELA	MA0107.1	Ig-fold	Rel	vertebrates	14.757	0.567	615	1024	7171	17581	1256	0.00522	13690	0.0038	35.598	28.637
GABPA	MA0062.2	Winged Helix-Turn-Helix	Ets	vertebrates	13.335	0.647	769	870	9355	15397	1784	0.00815	20927	0.0064	34.133	29.241
FEV	MA0156.1	Winged Helix-Turn-Helix	Ets	vertebrates	12.121	0.442	1159	480	15402	9350	6326	0.021	81722	0.0182	33.138	27.151
REL	MA0101.1	Ig-fold	Rel	vertebrates	10.515	0.559	817	822	10514	14238	2410	0.01	29250	0.00813	32.516	19.441
SPI1	MA0080.2	Winged Helix-Turn-Helix	Ets	vertebrates	9.64	0.435	1172	467	15792	8960	7316	0.0213	95792	0.0186	30.261	23.144
NFKB1	MA0105.1	Ig-fold	Rel	vertebrates	15.627	0.758	369	1270	3946	20806	604	0.00276	6372	0.00195	28.563	25.016
SPIB	MA0081.1	Winged Helix-Turn-Helix	Ets	vertebrates	9.06	0.466	1278	361	17547	7205	12887	0.0375	175639	0.0342	28.212	22.375
RUNX1	MA0002.2	Ig-fold	Runt	vertebrates	10.401	0.502	1041	598	13641	11111	4443	0.0203	58648	0.0179	27.739	24.987
IRF2	MA0051.1	Winged Helix-Turn-Helix	IRF	vertebrates	21.134	0.412	101	1538	844	23908	113	0.000845	923	0.000462	27.66	16.548
Klf4	MA0039.2	Zinc-coordinating	BetaBetaAlpha-zinc finger	vertebrates	12.618	0.771	1016	623	13645	11107	6588	0.0274	88731	0.0247	27.075	17.325
STAT1	MA0137.2	Ig-fold	Stat	vertebrates	13.119	0.452	517	1122	6394	18358	912	0.00568	10990	0.00458	25.295	14.936
ELK1	MA0028.1	Winged Helix-Turn-Helix	Ets	vertebrates	8.812	0.568	1006	633	13642	11110	4142	0.0172	54748	0.0152	25.226	14.761
ZNF354C	MA0130.1	Zinc-coordinating	BetaBetaAlpha-zinc finger	vertebrates	8.958	0.615	1254	385	17566	7186	14997	0.0374	207738	0.0346	23.228	14.356
Stat3	MA0144.1	Ig-fold	Stat	vertebrates	13.601	0.505	767	872	9883	14869	1855	0.0077	23645	0.00657	21.778	17.377
MZF1_1-4	MA0056.1	Zinc-coordinating	BetaBetaAlpha-zinc finger	vertebrates	8.586	0.725	1210	429	16863	7889	14448	0.036	201000	0.0335	21.491	14.316
EBF1	MA0154.1	Zipper-Type	Helix-Loop-Helix	vertebrates	11.564	0.648	831	808	11288	13464	2922	0.0121	39149	0.0109	18.808	10.269
Hand1::Tcfe2a	MA0092.1	Zipper-Type	Helix-Loop-Helix	vertebrates	10.144	0.507	941	698	13286	11466	4018	0.0167	54768	0.0152	18.623	6.344
INSM1	MA0155.1	Zinc-coordinating	BetaBetaAlpha-zinc finger	vertebrates	14.862	0.667	574	1065	7588	17164	1362	0.00679	17685	0.0059	18.056	8.901
PPARG::RXRA	MA0065.2	Zinc-coordinating	Hormone-nuclear Receptor	vertebrates	11.663	0.547	473	1166	6067	18685	866	0.0054	11080	0.00462	17.776	9.784
NHLH1	MA0048.1	Zipper-Type	Helix-Loop-Helix	vertebrates	14.132	0.674	457	1182	5783	18969	780	0.00389	9874	0.00329	16.112	10.666
SP1	MA0079.2	Zinc-coordinating	BetaBetaAlpha-zinc finger	vertebrates	11.129	0.82	924	715	12391	12361	5705	0.0237	79797	0.0222	16.028	14.722
Tcfcp2l1	MA0145.1	Other	CP2	vertebrates	11.65	0.609	783	856	10591	14161	2348	0.0137	32190	0.0125	15.767	9.977
MZF1_5-13	MA0057.1	Zinc-coordinating	BetaBetaAlpha-zinc finger	vertebrates	9.4	0.588	960	679	13425	11327	5548	0.023	77649	0.0216	15.654	7.98
SRF	MA0083.1	Other Alpha-Helix	MADS	vertebrates	17.965	0.466	84	1555	908	23844	102	0.000508	1019	0.00034	14.176	6.021
HNF4A	MA0114.1	Zinc-coordinating	Hormone-nuclear Receptor	vertebrates	9.617	0.522	476	1163	6389	18363	858	0.00463	11240	0.00406	13.96	6.064
Zfp423	MA0116.1	Zinc-coordinating	BetaBetaAlpha-zinc finger	vertebrates	17.925	0.679	423	1216	5691	19061	772	0.00481	10149	0.00423	13.846	5.257
ELK4	MA0076.1	Winged Helix-Turn-Helix	Ets	vertebrates	14.123	0.583	480	1159	6034	18718	738	0.00276	9342	0.00234	13.567	11.941
IRF1	MA0050.1	Winged Helix-Turn-Helix	IRF	vertebrates	16.008	0.383	490	1149	6075	18677	877	0.00437	11517	0.00384	13.307	13.741
NFE2L2	MA0150.1	Zipper-Type	Leucine Zipper	vertebrates	14.394	0.486	437	1202	5635	19117	696	0.00318	8970	0.00274	12.991	8.543
NR2F1	MA0017.1	Zinc-coordinating	Hormone-nuclear Receptor	vertebrates	15.924	0.478	290	1349	3735	21017	402	0.00234	5073	0.00197	12.719	5.842
RREB1	MA0073.1	Zinc-coordinating	BetaBetaAlpha-zinc finger	vertebrates	22.278	0.623	127	1512	1520	23232	154	0.00128	1839	0.00102	12.48	5.043
CTCF	MA0139.1	Zinc-coordinating	BetaBetaAlpha-zinc finger	vertebrates	17.205	0.645	244	1395	3236	21516	311	0.00245	3982	0.0021	11.913	3.876
Myf	MA0055.1	Zipper-Type	Helix-Loop-Helix	vertebrates	15.914	0.609	731	908	10157	14595	1982	0.00988	27519	0.00918	11.422	5.986
ESR1	MA0112.2	Zinc-coordinating	Hormone-nuclear Receptor	vertebrates	13.563	0.594	35	1604	345	24407	36	0.000299	355	0.000197	11.219	4.334
RXR::RAR_DR5	MA0159.1	Zinc-coordinating	Hormone-nuclear Receptor	vertebrates	16.004	0.535	111	1528	1313	23439	122	0.000861	1499	0.000708	8.93	4.865
TEAD1	MA0090.1	Helix-Turn-Helix	Homeo	vertebrates	15.678	0.507	386	1253	5222	19530	623	0.0031	8446	0.00282	8.448	4.532
Myc	MA0147.1	Zipper-Type	Helix-Loop-Helix	vertebrates	11.157	0.686	604	1035	8288	16464	1325	0.0055	18476	0.00513	8.011	5.817
Myb	MA0100.1	Helix-Turn-Helix	Myb	vertebrates	9.883	0.591	954	685	13518	11234	4089	0.0136	58600	0.013	7.656	6.002
MAX	MA0058.1	Zipper-Type	Helix-Loop-Helix	vertebrates	12.685	0.571	588	1051	7993	16759	1140	0.00473	15900	0.00442	7.402	6.45
PLAG1	MA0163.1	Zinc-coordinating	BetaBetaAlpha-zinc finger	vertebrates	19.352	0.798	146	1493	1971	22781	189	0.0011	2462	0.000958	7.072	2.351
Nkx3-2	MA0122.1	Helix-Turn-Helix	Homeo	vertebrates	8.542	0.463	1093	546	15425	9327	6309	0.0236	91612	0.0229	6.968	8.508
AP1	MA0099.2	Zipper-Type	Leucine Zipper	vertebrates	9.193	0.405	1158	481	16390	8362	7800	0.0227	113253	0.022	6.85	9.107
NR4A2	MA0160.1	Zinc-coordinating	Hormone-nuclear Receptor	vertebrates	10.165	0.491	972	667	13896	10856	4169	0.0139	60034	0.0133	6.849	5.027
Pax4	MA0068.1	Helix-Turn-Helix	Homeo	vertebrates	11.004	0.441	11	1628	112	24640	11	0.000137	113	9.42e-05	6.819	1.948
CREB1	MA0018.2	Zipper-Type	Leucine Zipper	vertebrates	10.139	0.523	643	996	9204	15548	1402	0.00466	19712	0.00438	6.489	2.964
Ar	MA0007.1	Zinc-coordinating	Hormone-nuclear Receptor	vertebrates	15.703	0.498	44	1595	534	24218	45	0.000411	554	0.000339	6.097	2.351
Egr1	MA0162.1	Zinc-coordinating	BetaBetaAlpha-zinc finger	vertebrates	14.456	0.739	459	1180	6364	18388	867	0.00396	12188	0.00373	5.996	3.814
Esrrb	MA0141.1	Zinc-coordinating	Hormone-nuclear Receptor	vertebrates	12.806	0.524	672	967	10167	14585	1831	0.00913	26346	0.00878	5.661	0.628
ESR2	MA0258.1	Zinc-coordinating	Hormone-nuclear Receptor	vertebrates	13.618	0.546	161	1478	2219	22533	195	0.00146	2670	0.00134	5.19	2.042
Tal1::Gata1	MA0140.1	Zipper-Type	Helix-Loop-Helix	vertebrates	11.297	0.451	431	1208	6212	18540	780	0.00583	11200	0.0056	4.764	1.924
TLX1::NFIC	MA0119.1	Helix-Turn-Helix::Other	Homeo::Nuclear Factor I-CCAAT-binding	vertebrates	19.665	0.598	84	1555	1066	23686	89	0.000517	1162	0.000452	4.763	2.686
Mycn	MA0104.2	Zipper-Type	Helix-Loop-Helix	vertebrates	11.104	0.699	588	1051	8332	16420	1318	0.00547	18928	0.00526	4.597	3.331
USF1	MA0093.1	Zipper-Type	Helix-Loop-Helix	vertebrates	11.29	0.643	653	986	9330	15422	1534	0.00446	21993	0.00428	4.321	3.124
NFATC2	MA0152.1	Ig-fold	Rel	vertebrates	9.859	0.346	1050	589	15176	9576	6662	0.0194	97757	0.019	4.017	4.269
TAL1::TCF3	MA0091.1	Zipper-Type	Helix-Loop-Helix	vertebrates	14.07	0.453	515	1124	7491	17261	1016	0.00506	14681	0.0049	3.739	1.78
Evi1	MA0029.1	Zinc-coordinating	BetaBetaAlpha-zinc finger	vertebrates	17.909	0.28	131	1508	1931	22821	176	0.00102	2457	0.000956	3.381	0.906
RORA_2	MA0072.1	Zinc-coordinating	Hormone-nuclear Receptor	vertebrates	17.425	0.369	258	1381	3571	21181	354	0.00206	5079	0.00198	2.877	2.553
Sox2	MA0143.1	Other Alpha-Helix	High Mobility Group	vertebrates	12.951	0.361	191	1448	2809	21943	269	0.00168	3844	0.0016	2.849	1.007
TP53	MA0106.1	Zinc-coordinating	Loop-Sheet-Helix	vertebrates	26.239	0.603	1	1638	8	24744	1	8.31e-06	8	4.45e-06	2.688	0.824
MYC::MAX	MA0059.1	Zipper-Type	Helix-Loop-Helix	vertebrates	14.237	0.602	244	1395	3436	21316	313	0.00143	4535	0.00139	1.819	1.997
RORA_1	MA0071.1	Zinc-coordinating	Hormone-nuclear Receptor	vertebrates	13.19	0.424	581	1058	8624	16128	1284	0.00533	18895	0.00525	1.766	1.147
HIF1A::ARNT	MA0259.1	Zipper-Type	Helix-Loop-Helix	vertebrates	9.74	0.657	776	863	10914	13838	2551	0.00848	37662	0.00837	1.766	5.188
Gata1	MA0035.2	Zinc-coordinating	GATA	vertebrates	10.878	0.373	991	648	14350	10402	5113	0.0234	75905	0.0232	1.63	3.679
EWSR1-FLI1	MA0149.1	Winged Helix-Turn-Helix	Ets	vertebrates	32.871	0.554	15	1624	207	24545	15	0.000112	209	0.000105	1.123	0.901
Arnt::Ahr	MA0006.1	Zipper-Type	Helix-Loop-Helix	vertebrates	9.532	0.715	939	700	13597	11155	4447	0.0111	66086	0.011	0.945	3.404
Arnt	MA0004.1	Zipper-Type	Helix-Loop-Helix	vertebrates	10.992	0.642	481	1158	7052	17700	942	0.00235	13904	0.00232	0.94	1.441
Zfx	MA0146.1	Zinc-coordinating	BetaBetaAlpha-zinc finger	vertebrates	13.077	0.749	704	935	9872	14880	2235	0.013	33238	0.0129	0.895	4.867
NR1H2::RXRA	MA0115.1	Zinc-coordinating	Hormone-nuclear Receptor	vertebrates	27.878	0.445	7	1632	99	24653	7	4.94e-05	100	4.72e-05	0.447	0.714
T	MA0009.1	Beta-Hairpin-Ribbon	T	vertebrates	17.863	0.452	118	1521	1811	22941	143	0.000653	2114	0.000646	0.424	0.537
HNF1A	MA0046.1	Helix-Turn-Helix	Homeo	vertebrates	15.548	0.259	206	1433	3044	21708	293	0.0017	4352	0.00169	0.395	0.954
Spz1	MA0111.1	Other	Other	vertebrates	11.907	0.538	461	1178	6658	18094	839	0.00383	12530	0.00383	0.074	1.927
Pax6	MA0069.1	Helix-Turn-Helix	Homeo	vertebrates	13.798	0.432	78	1561	1218	23534	92	0.000535	1377	0.000536	-0.063	0.458
CEBPA	MA0102.2	Zipper-Type	Leucine Zipper	vertebrates	8.712	0.358	908	731	12828	11924	3718	0.0139	55606	0.0139	-0.115	5.914
MIZF	MA0131.1	Zinc-coordinating	BetaBetaAlpha-zinc finger	vertebrates	13.197	0.61	140	1499	2080	22672	166	0.000689	2497	0.000694	-0.271	0.83
YY1	MA0095.1	Zinc-coordinating	BetaBetaAlpha-zinc finger	vertebrates	8.101	0.51	1142	497	17190	7562	11029	0.0275	165054	0.0275	-0.327	0.832
ZEB1	MA0103.1	Zinc-coordinating	BetaBetaAlpha-zinc finger	vertebrates	8.305	0.557	1198	441	17454	7298	11416	0.0284	171132	0.0285	-0.778	4.29
NR3C1	MA0113.1	Zinc-coordinating	Hormone-nuclear Receptor	vertebrates	14.749	0.432	171	1468	2522	22230	208	0.00155	3161	0.00158	-1.025	0.945
RXRA::VDR	MA0074.1	Zinc-coordinating	Hormone-nuclear Receptor	vertebrates	20.451	0.527	30	1609	453	24299	30	0.000187	475	0.000198	-1.245	0.641
znf143	MA0088.1	Zinc-coordinating	BetaBetaAlpha-zinc finger	vertebrates	17.541	0.53	88	1551	1301	23451	95	0.000789	1473	0.000819	-1.611	0.825
Nr2e3	MA0164.1	Zinc-coordinating	Hormone-nuclear Receptor	vertebrates	12.028	0.373	423	1216	6354	18398	803	0.00233	12287	0.00239	-1.766	0.775
PPARG	MA0066.1	Zinc-coordinating	Hormone-nuclear Receptor	vertebrates	20.365	0.523	3	1636	62	24690	3	2.49e-05	64	3.56e-05	-2.824	0.252
Pax5	MA0014.1	Helix-Turn-Helix	Homeo	vertebrates	12.432	0.575	79	1560	1224	23528	85	0.000706	1364	0.000758	-2.942	0.5
HLF	MA0043.1	Zipper-Type	Leucine Zipper	vertebrates	11.147	0.394	368	1271	5508	19244	645	0.00321	9969	0.00332	-2.957	0.831
E2F1	MA0024.1	Winged Helix-Turn-Helix	E2F	vertebrates	13.838	0.625	561	1078	8113	16639	1139	0.00378	17630	0.00392	-3.348	2.134
FOXA1	MA0148.1	Winged Helix-Turn-Helix	Forkhead	vertebrates	12.533	0.332	900	739	13355	11397	4155	0.019	63112	0.0193	-3.478	1.453
Gfi	MA0038.1	Zinc-coordinating	BetaBetaAlpha-zinc finger	vertebrates	9.47	0.391	945	694	13731	11021	4319	0.0179	65844	0.0183	-4.148	3.108
SOX9	MA0077.1	Other Alpha-Helix	High Mobility Group	vertebrates	9.079	0.358	741	898	11417	13335	2692	0.0101	41403	0.0104	-4.474	0.259
Sox17	MA0078.1	Other Alpha-Helix	High Mobility Group	vertebrates	10.502	0.384	923	716	13879	10873	4306	0.0161	65883	0.0165	-4.642	0.834
Pou5f1	MA0142.1	Helix-Turn-Helix	Homeo	vertebrates	14.808	0.308	209	1430	3402	21350	325	0.00202	5205	0.00217	-4.834	0.128
FOXF2	MA0030.1	Winged Helix-Turn-Helix	Forkhead	vertebrates	14.824	0.334	257	1382	4097	20655	405	0.00235	6459	0.00251	-4.896	0.186
Ddit3::Cebpa	MA0019.1	Zipper-Type	Leucine Zipper	vertebrates	11.652	0.483	374	1265	5576	19176	606	0.00302	9754	0.00325	-6.333	0.911
NFYA	MA0060.1	Other Alpha-Helix	NFY CCAAT-binding	vertebrates	12.925	0.523	385	1254	5865	18887	593	0.00394	9476	0.00421	-6.529	0.536
FOXO3	MA0157.1	Winged Helix-Turn-Helix	Forkhead	vertebrates	11.734	0.298	925	714	13611	11141	4487	0.0149	69410	0.0154	-6.562	2.022
MEF2A	MA0052.1	Other Alpha-Helix	MADS	vertebrates	15.709	0.179	447	1192	7006	17746	977	0.00406	15631	0.00434	-6.745	0.195
PBX1	MA0070.1	Helix-Turn-Helix	Homeo	vertebrates	14.641	0.31	260	1379	4107	20645	399	0.00199	6634	0.00221	-7.388	0.238
Foxa2	MA0047.2	Winged Helix-Turn-Helix	Forkhead	vertebrates	13.268	0.315	803	836	11656	13096	2796	0.0139	43535	0.0145	-7.546	2.644
HOXA5	MA0158.1	Helix-Turn-Helix	Homeo	vertebrates	8.759	0.315	1209	430	17629	7123	13423	0.0446	205993	0.0458	-8.85	4.252
FOXD1	MA0031.1	Winged Helix-Turn-Helix	Forkhead	vertebrates	11.926	0.275	861	778	13087	11665	3989	0.0133	62921	0.014	-9.69	0.486
REST	MA0138.2	Zinc-coordinating	BetaBetaAlpha-zinc finger	vertebrates	23.134	0.596	7	1632	232	24520	7	6.11e-05	242	0.000141	-10.495	0.007
Foxq1	MA0040.1	Winged Helix-Turn-Helix	Forkhead	vertebrates	14.07	0.202	517	1122	8007	16745	1349	0.00616	22088	0.00675	-11.152	0.277
NFIL3	MA0025.1	Zipper-Type	Leucine Zipper	vertebrates	14.139	0.265	421	1218	6731	18021	946	0.00432	15828	0.00484	-11.545	0.091
FOXI1	MA0042.1	Winged Helix-Turn-Helix	Forkhead	vertebrates	13.183	0.263	765	874	11680	13072	3107	0.0155	49366	0.0165	-11.902	0.407
HNF1B	MA0153.1	Helix-Turn-Helix	Homeo	vertebrates	16.821	0.222	235	1404	4107	20645	388	0.00193	6910	0.0023	-11.992	0.007
Lhx3	MA0135.1	Helix-Turn-Helix	Homeo	vertebrates	16.354	0.131	346	1293	5806	18946	756	0.00408	12758	0.00461	-12.073	0.013
Foxd3	MA0041.1	Winged Helix-Turn-Helix	Forkhead	vertebrates	12.945	0.223	733	906	11354	13398	3106	0.0155	49535	0.0165	-12.629	0.194
TBP	MA0108.2	Beta-sheet	TATA-binding	vertebrates	10.086	0.377	667	972	10389	14363	2099	0.0131	33775	0.0141	-13.187	0.161
Nobox	MA0125.1	Helix-Turn-Helix	Homeo	vertebrates	9.573	0.26	871	768	13558	11194	4794	0.0159	77190	0.0172	-14.704	0.1
Sox5	MA0087.1	Other Alpha-Helix	High Mobility Group	vertebrates	10.831	0.199	832	807	13087	11665	4406	0.0128	72042	0.014	-15.888	0.047
Pdx1	MA0132.1	Helix-Turn-Helix	Homeo	vertebrates	9.04	0.194	1011	628	15507	9245	8713	0.0217	140973	0.0235	-18.345	0.235
SRY	MA0084.1	Other Alpha-Helix	High Mobility Group	vertebrates	9.193	0.238	962	677	14714	10038	6318	0.0236	101929	0.0255	-18.456	0.308
Prrx2	MA0075.1	Helix-Turn-Helix	Homeo	vertebrates	9.063	0.027	983	656	15063	9689	7498	0.0156	123270	0.0171	-18.611	0.263
NKX3-1	MA0124.1	Helix-Turn-Helix	Homeo	vertebrates	11.127	0.179	794	845	12654	12098	4012	0.0117	68823	0.0134	-23.262	0.017
ARID3A	MA0151.1	Helix-Turn-Helix	Arid	vertebrates	9.896	0.062	1090	549	16086	8666	10120	0.0252	166235	0.0277	-23.599	2.197
Nkx2-5	MA0063.1	Helix-Turn-Helix	Homeo	vertebrates	8.27	0.218	1123	516	16973	7779	12033	0.035	197210	0.0384	-27.274	0.634

## Sheet: TFBS analysis suppl to Fig. 2
TF	JASPAR ID	Class	Family	Tax Group	IC	GC Content	Target gene hits	Target gene non-hits	Background gene hits	Background gene non-hits	Target TFBS hits	Target TFBS nucleotide rate	Background TFBS hits	Background TFBS nucleotide rate	Z-score	Fisher score
STAT1	MA0137.2	Ig-fold	Stat	vertebrates	13.119	0.452	24	19	8920	15832	39	0.00783	18052	0.00434	14.484	5.05
FOXA1	MA0148.1	Winged Helix-Turn-Helix	Forkhead	vertebrates	12.533	0.332	27	16	16631	8121	173	0.0255	104987	0.0185	14.103	0.244
RELA	MA0107.1	Ig-fold	Rel	vertebrates	14.757	0.567	21	22	9579	15173	47	0.00629	21534	0.00345	13.202	2.167
Foxa2	MA0047.2	Winged Helix-Turn-Helix	Forkhead	vertebrates	13.268	0.315	25	18	14948	9804	118	0.019	72761	0.014	11.522	0.387
CEBPA	MA0102.2	Zipper-Type	Leucine Zipper	vertebrates	8.712	0.358	30	13	16183	8569	148	0.0178	92641	0.0134	10.613	1.097
Stat3	MA0144.1	Ig-fold	Stat	vertebrates	13.601	0.505	26	17	12885	11867	68	0.0091	38585	0.00619	10.148	1.765
ELF5	MA0136.1	Winged Helix-Turn-Helix	Ets	vertebrates	8.693	0.429	36	7	19413	5339	282	0.034	193604	0.0279	10.014	1.338
TLX1::NFIC	MA0119.1	Helix-Turn-Helix::Other	Homeo::Nuclear Factor I-CCAAT-binding	vertebrates	19.665	0.598	4	39	1628	23124	6	0.00112	1853	0.000416	9.41	1.16
MEF2A	MA0052.1	Other Alpha-Helix	MADS	vertebrates	15.709	0.179	17	26	9649	15103	48	0.00643	26172	0.0042	9.402	0.638
Pax4	MA0068.1	Helix-Turn-Helix	Homeo	vertebrates	11.004	0.441	1	42	172	24580	1	0.000402	175	8.42e-05	9.259	1.346
HLF	MA0043.1	Zipper-Type	Leucine Zipper	vertebrates	11.147	0.394	15	28	7663	17089	31	0.00498	16085	0.00309	9.247	1.074
Esrrb	MA0141.1	Zinc-coordinating	Hormone-nuclear Receptor	vertebrates	12.806	0.524	26	17	13274	11478	72	0.0116	44127	0.00849	9.149	1.475
ARID3A	MA0151.1	Helix-Turn-Helix	Arid	vertebrates	9.896	0.062	34	9	19243	5509	404	0.0325	282171	0.0271	8.92	0.686
HOXA5	MA0158.1	Helix-Turn-Helix	Homeo	vertebrates	8.759	0.315	37	6	20507	4245	471	0.0504	345424	0.0443	8.152	0.975
NFATC2	MA0152.1	Ig-fold	Rel	vertebrates	9.859	0.346	33	10	18422	6330	237	0.0222	162917	0.0183	7.999	0.815
RXRA::VDR	MA0074.1	Zinc-coordinating	Hormone-nuclear Receptor	vertebrates	20.451	0.527	3	40	763	23989	3	0.000602	812	0.000195	7.834	1.918
FOXD1	MA0031.1	Winged Helix-Turn-Helix	Forkhead	vertebrates	11.926	0.275	26	17	16396	8356	156	0.0167	105026	0.0135	7.661	0.184
NR1H2::RXRA	MA0115.1	Zinc-coordinating	Hormone-nuclear Receptor	vertebrates	27.878	0.445	1	42	151	24601	1	0.000228	152	4.14e-05	7.621	1.459
FOXO3	MA0157.1	Winged Helix-Turn-Helix	Forkhead	vertebrates	11.734	0.298	28	15	16867	7885	170	0.0182	115735	0.0148	7.588	0.32
FEV	MA0156.1	Winged Helix-Turn-Helix	Ets	vertebrates	12.121	0.442	36	7	18321	6431	195	0.0209	134763	0.0173	7.538	2.332
Gata1	MA0035.2	Zinc-coordinating	GATA	vertebrates	10.878	0.373	30	13	17588	7164	180	0.0265	127191	0.0224	7.515	0.437
SRF	MA0083.1	Other Alpha-Helix	MADS	vertebrates	17.965	0.466	5	38	1385	23367	5	0.000803	1623	0.000312	7.493	2.395
Hand1::Tcfe2a	MA0092.1	Zipper-Type	Helix-Loop-Helix	vertebrates	10.144	0.507	26	17	16514	8238	133	0.0178	90987	0.0146	7.323	0.164
PBX1	MA0070.1	Helix-Turn-Helix	Homeo	vertebrates	14.641	0.31	11	32	6010	18742	21	0.00337	11131	0.00214	7.247	0.735
RUNX1	MA0002.2	Ig-fold	Runt	vertebrates	10.401	0.502	27	16	16803	7949	139	0.0205	96969	0.0171	7.09	0.209
RORA_1	MA0071.1	Zinc-coordinating	Hormone-nuclear Receptor	vertebrates	13.19	0.424	25	18	11813	12939	52	0.00696	32065	0.00514	6.934	2.185
RREB1	MA0073.1	Zinc-coordinating	BetaBetaAlpha-zinc finger	vertebrates	22.278	0.623	6	37	2093	22659	6	0.00161	2693	0.000864	6.852	1.88
GABPA	MA0062.2	Winged Helix-Turn-Helix	Ets	vertebrates	13.335	0.647	22	21	11654	13098	51	0.00751	32012	0.00565	6.78	1.049
CREB1	MA0018.2	Zipper-Type	Leucine Zipper	vertebrates	10.139	0.523	20	23	11991	12761	52	0.00557	31548	0.00405	6.529	0.42
REL	MA0101.1	Ig-fold	Rel	vertebrates	10.515	0.559	22	21	13300	11452	70	0.00937	45821	0.00735	6.462	0.373
SPI1	MA0080.2	Winged Helix-Turn-Helix	Ets	vertebrates	9.64	0.435	36	7	18705	6047	222	0.0208	157597	0.0177	6.453	1.952
SPIB	MA0081.1	Winged Helix-Turn-Helix	Ets	vertebrates	9.06	0.466	39	4	20206	4546	387	0.0363	287467	0.0323	6.189	2.483
NFIL3	MA0025.1	Zipper-Type	Leucine Zipper	vertebrates	14.139	0.265	15	28	9366	15386	42	0.00619	26640	0.0047	5.918	0.346
Tal1::Gata1	MA0140.1	Zipper-Type	Helix-Loop-Helix	vertebrates	11.297	0.451	16	27	8802	15950	29	0.00699	18709	0.0054	5.904	0.76
SRY	MA0084.1	Other Alpha-Helix	High Mobility Group	vertebrates	9.193	0.238	29	14	18055	6697	232	0.028	170900	0.0247	5.796	0.177
NFYA	MA0060.1	Other Alpha-Helix	NFY CCAAT-binding	vertebrates	12.925	0.523	11	32	7619	17133	22	0.00471	13581	0.00348	5.669	0.204
NF-kappaB	MA0061.1	Ig-fold	Rel	vertebrates	13.345	0.621	22	21	10788	13964	45	0.00602	28976	0.00465	5.517	1.62
Gfi	MA0038.1	Zinc-coordinating	BetaBetaAlpha-zinc finger	vertebrates	9.47	0.391	27	16	16936	7816	150	0.0201	108745	0.0174	5.516	0.185
SOX9	MA0077.1	Other Alpha-Helix	High Mobility Group	vertebrates	9.079	0.358	21	22	14808	9944	99	0.0119	69047	0.00996	5.392	0.055
ELK4	MA0076.1	Winged Helix-Turn-Helix	Ets	vertebrates	14.123	0.583	14	29	8032	16720	24	0.00289	14162	0.00204	5.094	0.596
Pax6	MA0069.1	Helix-Turn-Helix	Homeo	vertebrates	13.798	0.432	4	39	1889	22863	5	0.000937	2272	0.00051	5.091	0.871
RXR::RAR_DR5	MA0159.1	Zinc-coordinating	Hormone-nuclear Receptor	vertebrates	16.004	0.535	5	38	2034	22718	5	0.00114	2441	0.000665	4.94	1.283
TBP	MA0108.2	Beta-sheet	TATA-binding	vertebrates	10.086	0.377	18	25	13499	11253	77	0.0155	55938	0.0135	4.756	0.035
Ar	MA0007.1	Zinc-coordinating	Hormone-nuclear Receptor	vertebrates	15.703	0.498	2	41	857	23895	2	0.000589	910	0.000321	3.989	0.817
Sox5	MA0087.1	Other Alpha-Helix	High Mobility Group	vertebrates	10.831	0.199	26	17	16524	8228	163	0.0153	121744	0.0137	3.782	0.163
IRF2	MA0051.1	Winged Helix-Turn-Helix	IRF	vertebrates	21.134	0.412	2	41	1309	23443	3	0.000723	1498	0.000432	3.734	0.398
Sox17	MA0078.1	Other Alpha-Helix	High Mobility Group	vertebrates	10.502	0.384	27	16	17242	7510	146	0.0176	110261	0.0159	3.661	0.136
NR2F1	MA0017.1	Zinc-coordinating	Hormone-nuclear Receptor	vertebrates	15.924	0.478	10	33	5433	19319	13	0.00244	8279	0.00186	3.628	0.74
ZNF354C	MA0130.1	Zinc-coordinating	BetaBetaAlpha-zinc finger	vertebrates	8.958	0.615	38	5	20143	4609	436	0.035	339804	0.0327	3.582	1.813
Evi1	MA0029.1	Zinc-coordinating	BetaBetaAlpha-zinc finger	vertebrates	17.909	0.28	7	36	3007	21745	7	0.00131	4137	0.000929	3.381	1.334
FOXF2	MA0030.1	Winged Helix-Turn-Helix	Forkhead	vertebrates	14.824	0.334	8	35	5872	18880	16	0.003	10673	0.0024	3.336	0.183
RORA_2	MA0072.1	Zinc-coordinating	Hormone-nuclear Receptor	vertebrates	17.425	0.369	9	34	5376	19376	13	0.00244	8536	0.00192	3.213	0.495
Pou5f1	MA0142.1	Helix-Turn-Helix	Homeo	vertebrates	14.808	0.308	6	37	5002	19750	13	0.00261	8677	0.00209	3.099	0.115
Nkx2-5	MA0063.1	Helix-Turn-Helix	Homeo	vertebrates	8.27	0.218	36	7	19952	4800	420	0.0394	332443	0.0373	2.951	0.948
TEAD1	MA0090.1	Helix-Turn-Helix	Homeo	vertebrates	15.678	0.507	13	30	7383	17369	20	0.00321	13821	0.00266	2.906	0.627
AP1	MA0099.2	Zipper-Type	Leucine Zipper	vertebrates	9.193	0.405	36	7	19377	5375	243	0.0228	189297	0.0212	2.887	1.366
HNF1A	MA0046.1	Helix-Turn-Helix	Homeo	vertebrates	15.548	0.259	7	36	4540	20212	11	0.00206	7278	0.00163	2.853	0.361
Foxq1	MA0040.1	Winged Helix-Turn-Helix	Forkhead	vertebrates	14.07	0.202	19	24	10879	13873	50	0.00736	37106	0.00654	2.756	0.604
NR4A2	MA0160.1	Zinc-coordinating	Hormone-nuclear Receptor	vertebrates	10.165	0.491	29	14	17099	7653	131	0.014	100487	0.0129	2.753	0.414
YY1	MA0095.1	Zinc-coordinating	BetaBetaAlpha-zinc finger	vertebrates	8.101	0.51	35	8	20101	4651	356	0.0286	280657	0.027	2.687	0.543
Prrx2	MA0075.1	Helix-Turn-Helix	Homeo	vertebrates	9.063	0.027	29	14	18248	6504	268	0.0179	208135	0.0167	2.666	0.145
CTCF	MA0139.1	Zinc-coordinating	BetaBetaAlpha-zinc finger	vertebrates	17.205	0.645	8	35	4662	20090	9	0.00229	6166	0.00188	2.553	0.55
HNF4A	MA0114.1	Zinc-coordinating	Hormone-nuclear Receptor	vertebrates	9.617	0.522	14	29	8772	15980	25	0.00435	18118	0.00378	2.533	0.348
TAL1::TCF3	MA0091.1	Zipper-Type	Helix-Loop-Helix	vertebrates	14.07	0.453	17	26	10401	14351	33	0.0053	24599	0.00473	2.24	0.381
Foxd3	MA0041.1	Winged Helix-Turn-Helix	Forkhead	vertebrates	12.945	0.223	22	21	14695	10057	106	0.017	83502	0.0161	2.084	0.112
Pdx1	MA0132.1	Helix-Turn-Helix	Homeo	vertebrates	9.04	0.194	27	16	18678	6074	299	0.024	238305	0.0229	1.988	0.021
Nr2e3	MA0164.1	Zinc-coordinating	Hormone-nuclear Receptor	vertebrates	12.028	0.373	12	31	8973	15779	28	0.00262	20394	0.00229	1.88	0.1
IRF1	MA0050.1	Winged Helix-Turn-Helix	IRF	vertebrates	16.008	0.383	12	31	8543	16209	25	0.00402	18860	0.00363	1.734	0.152
Myb	MA0100.1	Helix-Turn-Helix	Myb	vertebrates	9.883	0.591	32	11	16359	8393	118	0.0126	93264	0.012	1.685	1.828
NKX3-1	MA0124.1	Helix-Turn-Helix	Homeo	vertebrates	11.127	0.179	25	18	15976	8776	147	0.0138	116573	0.0131	1.654	0.163
ESR1	MA0112.2	Zinc-coordinating	Hormone-nuclear Receptor	vertebrates	13.563	0.594	1	42	562	24190	1	0.000268	587	0.000188	1.451	0.465
Lhx3	MA0135.1	Helix-Turn-Helix	Homeo	vertebrates	16.354	0.131	10	33	8180	16572	28	0.00487	21786	0.00454	1.325	0.061
T	MA0009.1	Beta-Hairpin-Ribbon	T	vertebrates	17.863	0.452	5	38	2854	21898	5	0.000736	3534	0.000623	1.165	0.575
ESR2	MA0258.1	Zinc-coordinating	Hormone-nuclear Receptor	vertebrates	13.618	0.546	4	39	3425	21327	6	0.00145	4471	0.00129	1.134	0.147
ELK1	MA0028.1	Winged Helix-Turn-Helix	Ets	vertebrates	8.812	0.568	30	13	16401	8351	106	0.0142	85694	0.0137	1.048	0.97
Nobox	MA0125.1	Helix-Turn-Helix	Homeo	vertebrates	9.573	0.26	25	18	16799	7953	160	0.0171	129937	0.0167	0.993	0.068
HNF1B	MA0153.1	Helix-Turn-Helix	Homeo	vertebrates	16.821	0.222	7	36	6037	18715	15	0.00241	11661	0.00224	0.923	0.076
MIZF	MA0131.1	Zinc-coordinating	BetaBetaAlpha-zinc finger	vertebrates	13.197	0.61	4	39	2897	21855	5	0.000669	3667	0.000588	0.844	0.278
MAX	MA0058.1	Zipper-Type	Helix-Loop-Helix	vertebrates	12.685	0.571	18	25	10666	14086	32	0.00428	25588	0.0041	0.749	0.475
FOXI1	MA0042.1	Winged Helix-Turn-Helix	Forkhead	vertebrates	13.183	0.263	25	18	15011	9741	101	0.0162	82794	0.0159	0.636	0.369
Nkx3-2	MA0122.1	Helix-Turn-Helix	Homeo	vertebrates	8.542	0.463	32	11	18523	6229	184	0.0222	151665	0.0219	0.524	0.503
NFE2L2	MA0150.1	Zipper-Type	Leucine Zipper	vertebrates	14.394	0.486	13	30	7986	16766	18	0.00265	14688	0.00259	0.29	0.405
NFKB1	MA0105.1	Ig-fold	Rel	vertebrates	15.627	0.758	8	35	5272	19480	11	0.00162	9567	0.00169	-0.492	0.323
USF1	MA0093.1	Zipper-Type	Helix-Loop-Helix	vertebrates	11.29	0.643	18	25	11981	12771	41	0.00384	35301	0.00396	-0.548	0.17
Egr1	MA0162.1	Zinc-coordinating	BetaBetaAlpha-zinc finger	vertebrates	14.456	0.739	10	33	7797	16955	19	0.0028	16896	0.00298	-0.944	0.093
Arnt::Ahr	MA0006.1	Zipper-Type	Helix-Loop-Helix	vertebrates	9.532	0.715	27	16	16457	8295	119	0.00956	104216	0.01	-1.296	0.284
Pax5	MA0014.1	Helix-Turn-Helix	Homeo	vertebrates	12.432	0.575	2	41	1770	22982	2	0.000536	2036	0.000653	-1.327	0.195
TP53	MA0106.1	Zinc-coordinating	Loop-Sheet-Helix	vertebrates	26.239	0.603	0	43	15	24737	0	0	15	4.81e-06	-1.434	0
Ddit3::Cebpa	MA0019.1	Zipper-Type	Leucine Zipper	vertebrates	11.652	0.483	13	30	7871	16881	17	0.00273	15819	0.00304	-1.582	0.442
INSM1	MA0155.1	Zinc-coordinating	BetaBetaAlpha-zinc finger	vertebrates	14.862	0.667	15	28	9617	15135	30	0.00482	27315	0.00526	-1.67	0.284
E2F1	MA0024.1	Winged Helix-Turn-Helix	E2F	vertebrates	13.838	0.625	17	26	10328	14424	28	0.003	26153	0.00335	-1.711	0.401
PPARG	MA0066.1	Zinc-coordinating	Hormone-nuclear Receptor	vertebrates	20.365	0.523	0	43	92	24660	0	0	94	3.01e-05	-1.834	0
PPARG::RXRA	MA0065.2	Zinc-coordinating	Hormone-nuclear Receptor	vertebrates	11.663	0.547	13	30	8189	16563	19	0.00382	17716	0.00426	-1.894	0.346
MYC::MAX	MA0059.1	Zipper-Type	Helix-Loop-Helix	vertebrates	14.237	0.602	7	36	5031	19721	7	0.00103	7384	0.0013	-2.107	0.224
NR3C1	MA0113.1	Zinc-coordinating	Hormone-nuclear Receptor	vertebrates	14.749	0.432	5	38	3861	20891	5	0.0012	5299	0.00153	-2.315	0.196
EWSR1-FLI1	MA0149.1	Winged Helix-Turn-Helix	Ets	vertebrates	32.871	0.554	0	43	312	24440	0	0	315	9.09e-05	-2.798	0
EBF1	MA0154.1	Zipper-Type	Helix-Loop-Helix	vertebrates	11.564	0.648	23	20	13976	10776	67	0.00897	63009	0.0101	-3.111	0.344
ZEB1	MA0103.1	Zinc-coordinating	BetaBetaAlpha-zinc finger	vertebrates	8.305	0.557	35	8	20037	4715	312	0.0251	279745	0.0269	-3.13	0.574
REST	MA0138.2	Zinc-coordinating	BetaBetaAlpha-zinc finger	vertebrates	23.134	0.596	0	43	336	24416	0	0	360	0.000121	-3.175	0
Tcfcp2l1	MA0145.1	Other	CP2	vertebrates	11.65	0.609	24	19	13248	11504	55	0.0103	51434	0.0115	-3.178	0.815
Klf4	MA0039.2	Zinc-coordinating	BetaBetaAlpha-zinc finger	vertebrates	12.618	0.771	24	19	15642	9110	141	0.0189	129917	0.0208	-3.746	0.132
Arnt	MA0004.1	Zipper-Type	Helix-Loop-Helix	vertebrates	10.992	0.642	11	32	9061	15691	17	0.00137	20663	0.00199	-3.858	0.046
Mycn	MA0104.2	Zipper-Type	Helix-Loop-Helix	vertebrates	11.104	0.699	12	31	10582	14170	27	0.00361	29011	0.00465	-4.189	0.015
PLAG1	MA0163.1	Zinc-coordinating	BetaBetaAlpha-zinc finger	vertebrates	19.352	0.798	2	41	2686	22066	2	0.000375	3749	0.000841	-4.461	0.046
Sox2	MA0143.1	Other Alpha-Helix	High Mobility Group	vertebrates	12.951	0.361	4	39	4254	20498	4	0.000803	6395	0.00154	-5.17	0.049
Spz1	MA0111.1	Other	Other	vertebrates	11.907	0.538	8	35	9056	15696	16	0.00236	20217	0.00357	-5.574	0.003
Myc	MA0147.1	Zipper-Type	Helix-Loop-Helix	vertebrates	11.157	0.686	13	30	10648	14104	24	0.00321	28729	0.00461	-5.648	0.031
Myf	MA0055.1	Zipper-Type	Helix-Loop-Helix	vertebrates	15.914	0.609	21	22	13017	11735	42	0.00675	45441	0.00874	-5.875	0.3
HIF1A::ARNT	MA0259.1	Zipper-Type	Helix-Loop-Helix	vertebrates	9.74	0.657	23	20	13258	11494	51	0.00546	56950	0.0073	-5.933	0.569
Zfx	MA0146.1	Zinc-coordinating	BetaBetaAlpha-zinc finger	vertebrates	13.077	0.749	18	25	11692	13060	47	0.00881	50121	0.0113	-6.341	0.218
NHLH1	MA0048.1	Zipper-Type	Helix-Loop-Helix	vertebrates	14.132	0.674	8	35	7811	16941	10	0.00161	15721	0.00302	-7.09	0.019
znf143	MA0088.1	Zinc-coordinating	BetaBetaAlpha-zinc finger	vertebrates	17.541	0.53	0	43	1855	22897	0	0	2147	0.000688	-7.243	0
MZF1_5-13	MA0057.1	Zinc-coordinating	BetaBetaAlpha-zinc finger	vertebrates	9.4	0.588	28	15	16077	8675	113	0.0151	118638	0.019	-7.799	0.578
SP1	MA0079.2	Zinc-coordinating	BetaBetaAlpha-zinc finger	vertebrates	11.129	0.82	23	20	14208	10544	108	0.0145	114042	0.0183	-7.814	0.287
Zfp423	MA0116.1	Zinc-coordinating	BetaBetaAlpha-zinc finger	vertebrates	17.925	0.679	7	36	7506	17246	10	0.00201	16059	0.00386	-8.197	0.011
MZF1_1-4	MA0056.1	Zinc-coordinating	BetaBetaAlpha-zinc finger	vertebrates	8.586	0.725	35	8	19400	5352	312	0.0251	313995	0.0302	-8.22	0.924
